# Supplementary material
Source: publisher site journal article supplement (https://www.spandidos-publications.com/1820/downloadSupplementary)

Figure S1. Effect of ECL on p<sup>(S473)</sup>-AKT and total AKT expression in human NSCLC cells. The relative expression of (A and C) p<sup>(S473)</sup>-AKT and (B and D) total AKT normalized to  $\beta$ -actin in whole cell extracts of the A549 and Calu-1 cells treated with ECL at the IC<sub>20</sub>, IC<sub>40</sub>, and IC<sub>50</sub> concentrations for 24 h.  $\beta$ -actin was used as an internal control. Data are presented as the mean values  $\pm$  SD. \*P<0.05, \*\*P<0.01, \*\*\*P<0.001 vs. the untreated control group. ECL, eurycomalactone; AKT, protein kinase B; NSCLC, non-small cell lung cancer.

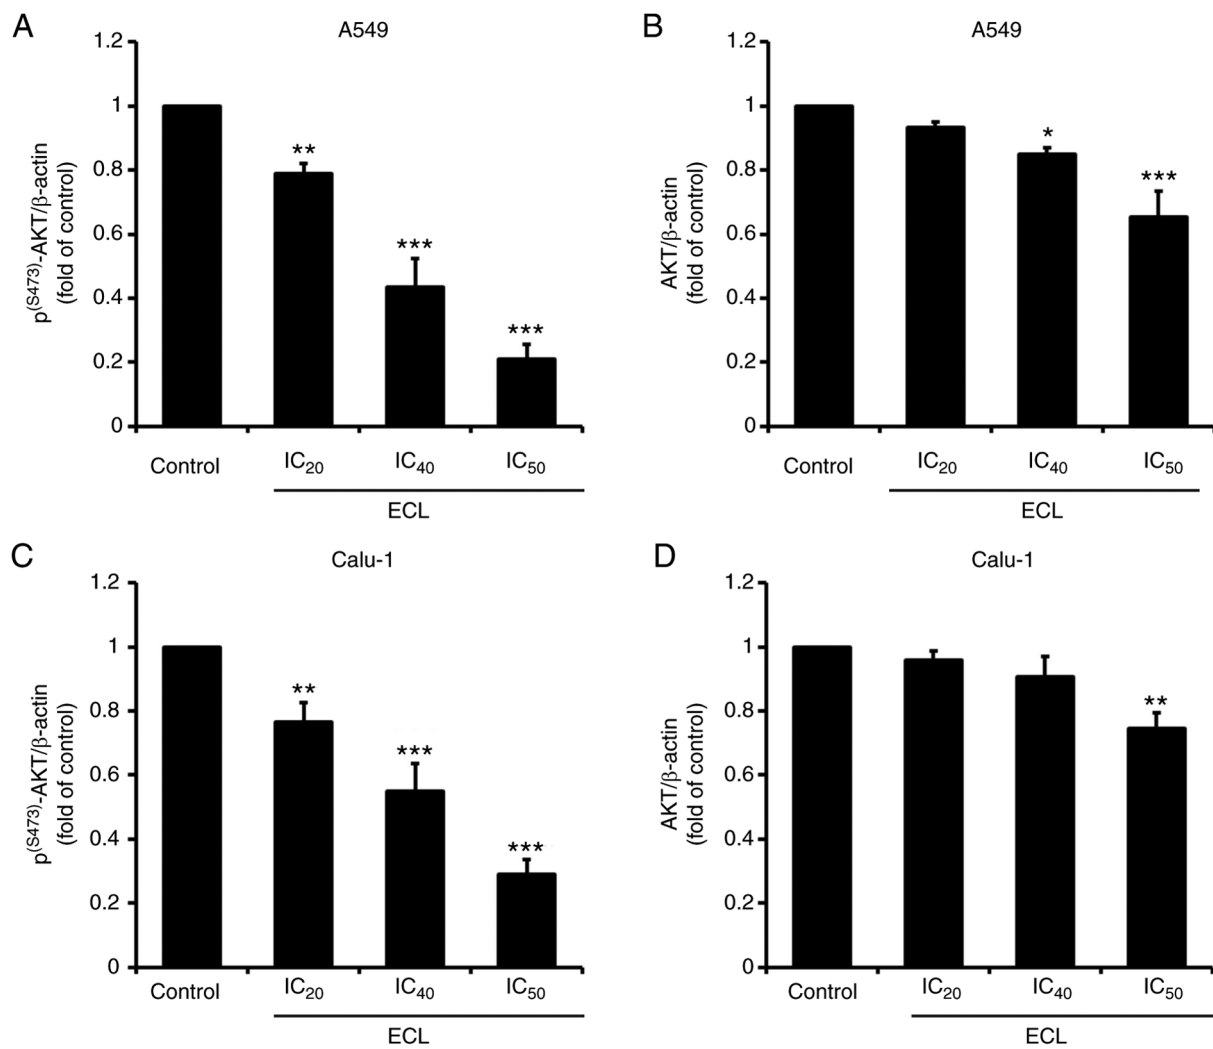

Figure S2. Effect of ECL on p<sup>(S536)</sup>-NF-κB p65 and total NF-κB p65 expression in human NSCLC cells. The relative expression of (A and C) p<sup>(S536)</sup>-NF-κB p65 and (B and D) total NF-κB p65 normalized to β-actin in whole cell extracts of the A549 cells and Calu-1 cells treated with ECL at the IC<sub>20</sub>, IC<sub>40</sub>, and IC<sub>50</sub> concentrations for 24 h. β-actin was used as an internal control. Data are presented as the mean values ± SD. \*P<0.05, \*\*P<0.01, \*\*\*P<0.001 vs. the untreated control group. ECL, eurycomalactone; NF-κB, nuclear factor-κB; NSCLC, non-small cell lung cancer.

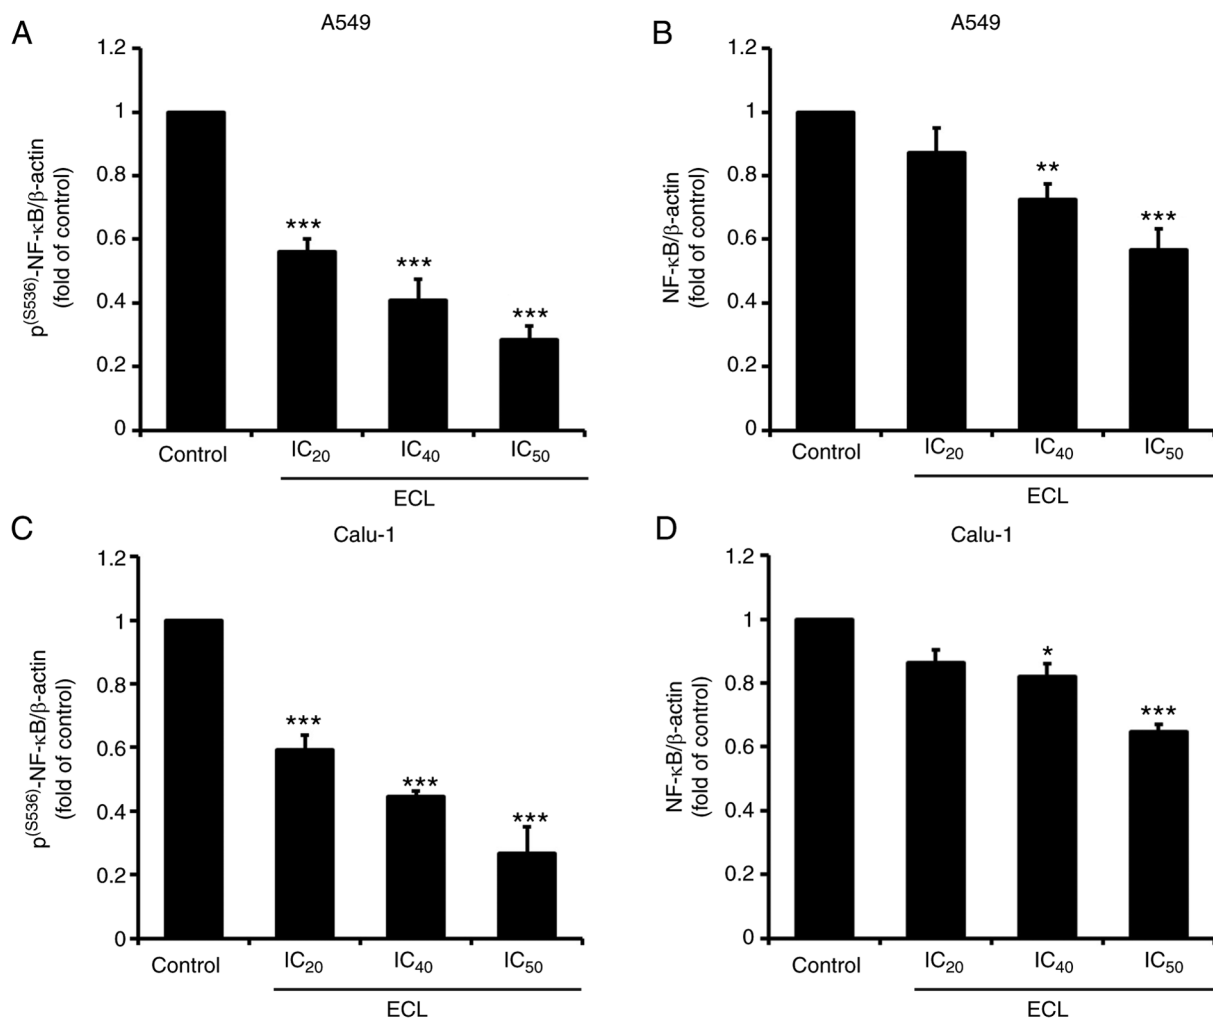

Supplement: Supplementary file 1 [file downloadSupplementary]
